# Supplementary material for: miR-3607-3p suppresses non-small cell lung cancer (NSCLC) by targeting TGFBR1 and CCNE2
Source: PLOS journal article supplement (doi:10.1371/journal.pgen.1007790), 2018-12-17
Supplement: S17 (10.1371/journal.pgen.1007790.s017) [file journal.pgen.1007790.s017]

## Sheet: Sheet1
						Relative micro RNA Level in A549 cell						Normalized absorbance value (OD570) in H157 cells				Number of colonies (×100) in A549 cell
						NC			inhibitor			NC		inhibitor		NC			inhibitor
						0.946058	1.04972	1.1487	0.279322	0.269807	0.239816	mean	SD	mean	SD	3.54	3.78	3.26	5.53	5.93	5.87
												1.00154	0.0844405	1.00401	0.104202
												1.67593	0.166358	2.10337	0.0841232
												3.07099	0.246054	4.39343	0.176106
												4.60826	0.197618	5.77885	0.400028
												5.54028	0.501103	6.79327	0.395518
	Cell Numbers (×10) in A549 cell
	NC									inhibitor
Migration	12	15	16	15	20	14	24	17	18	23	22	23	27	23	26	22	21	20
Invasion	11	13	7	12	16	15	20	13	14	20	21	26	17	18	22	24	21	17
					Percent of cells(%) in A549 cell
					NC			inhibitor
			G1 stage	64.95	65.12	63.12	49.03	46.08	45.8
			S stage	21.63	22.65	25.18	41.04	42.66	41.85
			G2/M stage	13.42	12.23	11.7	9.93	11.26	12.35
